# Supplementary material for: An eco-friendly electrolyte additive for high-power primary aqueous Mg–air batteries
Source: Royal Society of Chemistry journal article supplement (doi:10.1039/d3qi01223a), 2023-01-01
Supplement: d3qi01223a1.pdf [file d3qi01223a1.pdf]

## **Electronic Supplementary information (ESI)**

### **An eco-friendly electrolyte additive for high-power primary aqueous Mg-air batteries**

Bingjie Ma <sup>a</sup>, Wenbin Jiang <sup>a</sup>, Liuzhang Ouyang <sup>a,\*</sup>, Haiwen Li <sup>b,\*</sup>

*a. School of Materials Science and Engineering, Guangdong Engineering Technology Research*

*Center of Advanced Energy Storage Materials, South China University of Technology,*

*Guangzhou, 510641, China*

*b. Hefei General Machinery Research Institute, Hefei 230031, China*

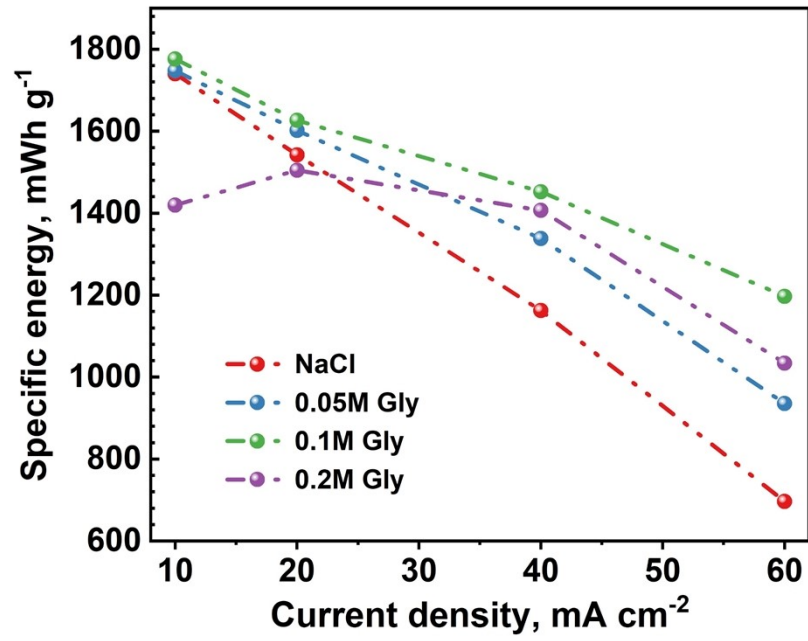

Fig. S1. Specific energy density for AZ31 alloys in different electrolytes.

**Table S1.** Comparison of the discharge performance of several Mg-based materials for Mg-air batteries.

| Magnesium anode                             | Current density<br>(mA cm <sup>-2</sup> ) | Average voltage<br>(V) | Anodic efficiency<br>(%) | Power density<br>(mW cm <sup>-2</sup> ) | Refs.     |
|---------------------------------------------|-------------------------------------------|------------------------|--------------------------|-----------------------------------------|-----------|
| AZ31 in NaCl+0.1M Gly                       | 40                                        | 1.02                   | 63.86                    | 40.72                                   |           |
|                                             | 60                                        | 0.81                   | 65.94                    | 48.6                                    | This work |
| T6 treated Mg-Gd-Zn                         | 40                                        | 0.91                   | 57.22                    | 36.4                                    |           |
| T4 treated Mg-Gd-Zn                         | 40                                        | 0.76                   | 56.81                    | 30.4                                    |           |
| As-cast Mg-Gd-Zn                            | 40                                        | 0.79                   | 53.92                    | 31.6                                    | 1         |
| Extruded Mg-Sn-Zn-Ca                        | 40                                        | 0.438                  | 57.72                    | 17.52                                   | 2         |
| As-cast Mg-10Zn-Y                           | 40                                        | 0.98                   | 47.5                     | 39.2                                    |           |
| As-cast Mg-6Zn-Y                            | 40                                        | 1.01                   | 55.14                    | 40.4                                    | 3         |
| Mg-2Zn-0.1Ca                                | 50                                        | 0.75                   | 49.1                     | 37.5                                    | 4         |
| Hot-rolled MAT61<br>(Mg-6Al-Sn)             | 60                                        | 0.74                   | 54                       | 44.4                                    | 5         |
| As-rolled AZ31                              | 40                                        | 0.78                   | 60.9                     | 31.2                                    |           |
| As-rolled LAZ831<br>(Mg-8Li-3Al-1Zn-0.2Y)   | 40                                        | 0.85                   | 60.8                     | 34.0                                    |           |
| As-rolled LAZ1131<br>(Mg-11Li-3Al-1Zn-0.2Y) | 40                                        | 0.91                   | 62.1                     | 36.4                                    | 6         |
| As-extruded Mg-1.5Ca                        | 40                                        | 0.908                  | ----                     | 36.32                                   | 7         |
| As-extruded Mg-2Zn-La                       | 40                                        | 0.98                   | 55.0                     | 39.2                                    | 8         |

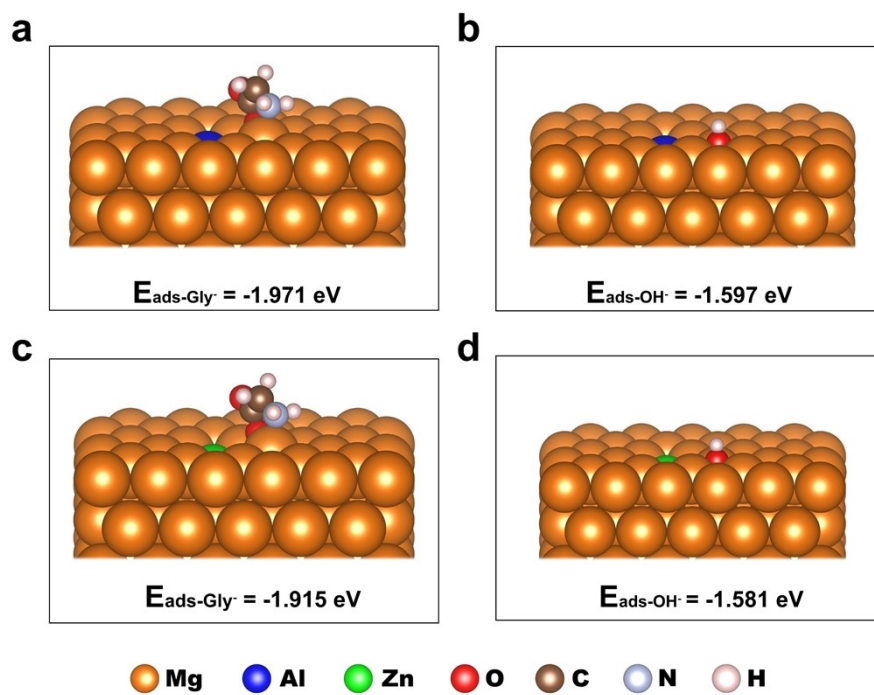

**Fig. S2.** (a-d) Adsorption energy of  $\text{OH}^-$  and  $\text{Gly}^-$  molecules on Al-dopant Mg and Zn-dopant Mg surfaces as well as corresponding adsorption modes.

**a**

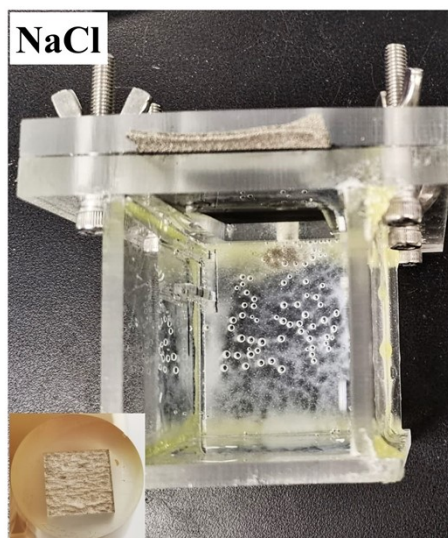

**b**

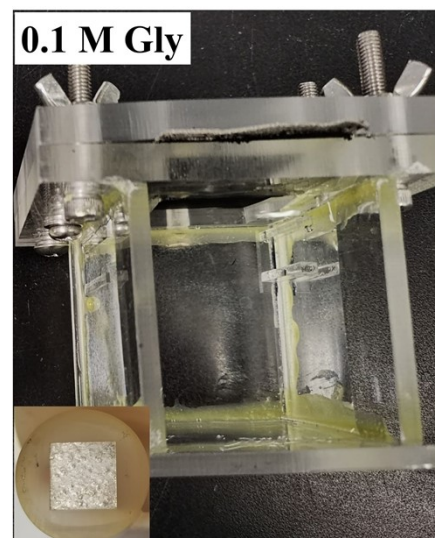

**Fig. S3.** (a-b) the corrosion products in the electrolytic cell after  $5 \text{ mA cm}^{-2}$  discharged for 10h using different electrolytes.

**Table S2.** The changes of pH value after discharge at high current densities.

| pH    | 40 mA cm <sup>-2</sup> | 60 mA cm <sup>-2</sup> |
|-------|------------------------|------------------------|
| NaCl  | 10.5 (±0.1)            | 10.9 (±0.1)            |
| 0.1 M | 9.5 (±0.1)             | 10.0 (±0.1)            |

## References

1. X. Chen, H. Wang, Q. Zou, Q. Le, C. Wen and A. Atrens, The influence of heat treatment on discharge and electrochemical properties of Mg-Gd-Zn magnesium anode with long period stacking ordered structure for Mg-air battery, *Electrochim. Acta*, 2020, **367**, 137518.
2. W.-l. Cheng, Y.-h. Chen, X.-j. Gu, J. Feng, H. Yu, H.-x. Wang, X.-f. Niu, L.-f. Wang and H. Li, Revealing the influence of crystallographic orientation on the electrochemical and discharge behaviors of extruded diluted Mg-Sn-Zn-Ca alloy as anode for Mg-air battery, *J. Power Sources*, 2022, **520**, 230802.
3. X. Chen, Q. Zou, Q. Le, J. Hou, R. Guo, H. Wang, C. Hu, L. Bao, T. Wang, D. Zhao, F. Yu and A. Atrens, The quasicrystal of Mg-Zn-Y on discharge and electrochemical behaviors as the anode for Mg-air battery, *J. Power Sources*, 2020, **451**, 227807.
4. S. Li, H. Li, C. Zhao, Z. Wang, K. Liu and W. Du, Effects of Ca addition on microstructure, electrochemical behavior and magnesium-air battery performance of Mg-2Zn-xCa alloys, *J. Electroanal. Chem.*, 2022, **904**, 115944.
5. H. Liu, Y. Yan, X. Wu, H. Fang, X. Chu, J. Huang, J. Zhang, J. Song and K. Yu, Effects of Al and Sn on microstructure, corrosion behavior and electrochemical performance of Mg-Al-based anodes for magnesium-air batteries, *J. Alloys Compd.*, 2021, **859**, 157755.
6. X. Liu, S. Liu and J. Xue, Discharge performance of the magnesium anodes with different phase constitutions for Mg-air batteries, *J. Power Sources*, 2018, **396**, 667-674.
7. X. Liu, J. Xue and D. Zhang, Electrochemical behaviors and discharge performance of the as-extruded Mg-1.5 wt%Ca alloys as anode for Mg-air battery, *J. Alloys Compd.*, 2019, **790**, 822-828.
8. X. Chen, Q. Zou, Z. Shi, Q. Le, M. Zhang and A. Atrens, The discharge performance of an as-extruded Mg-Zn-La-Ce anode for the primary Mg-air battery, *Electrochim. Acta*, 2022, **404**, 139763.
